# Supplementary material
Source: publisher figshare collection journal article supplement (https://tandf.figshare.com/ndownloader/files/22332846)

## **SUPPLEMENTARY APPENDIX**

**Transparent for whom? Dissemination of information on Ghana's  
petroleum and mining revenue management**

**SA Table 1. Main media and personal sources for general information**

A) Main media information sources in percent (%) for all respondents combined (column All) and separately for the different categories of the respondents

|                              | News about Ghana |         |         |              |              |      | News about own area |         |         |              |              |      |
|------------------------------|------------------|---------|---------|--------------|--------------|------|---------------------|---------|---------|--------------|--------------|------|
|                              | Com. cit.        | UC mem. | DA mem. | Trad. leader | Other leader | All  | Com. cit.           | UC mem. | DA mem. | Trad. leader | Other leader | All  |
| No first source              | 2                | 0       | 0       | 2            | 1            | 1    | 4                   | 11      | 11      | 11           | 8            | 8    |
| No second source             | 13               | 11      | 3       | 8            | 12           | 10   | 34                  | 34      | 42      | 43           | 30           | 36   |
| Radio                        | 86               | 88      | 81      | 91           | 92           | 87   | 63                  | 55      | 50      | 69           | 71           | 62   |
| Television                   | 72               | 75      | 71      | 73           | 74           | 73   | 21                  | 16      | 5       | 6            | 27           | 17   |
| Internet (websites)          | 10               | 9       | 24      | 4            | 6            | 10   | 3                   | 1       | 1       | 0            | 2            | 2    |
| Social media                 | 2                | 2       | 5       | 1            | 1            | 2    | 1                   | 1       | 1       | 1            | 1            | 1    |
| Cell phone                   | 7                | 7       | 7       | 12           | 3            | 7    | 18                  | 29      | 32      | 31           | 9            | 22   |
| Newspaper                    | 2                | 4       | 9       | 6            | 6            | 5    | 1                   | 1       | 2       | 0            | 2            | 1    |
| Billboard or poster          | 0                | 0       | 0       | 0            | 1            | 0    | 3                   | 3       | 7       | 4            | 9            | 5    |
| Information center           | 4                | 4       | 1       | 3            | 4            | 3    | 44                  | 40      | 38      | 30           | 33           | 39   |
| Information van              | 1                | 0       | 0       | 0            | 1            | 1    | 5                   | 6       | 6       | 4            | 6            | 5    |
| other                        | 0                | 0       | 0       | 0            | 0            | 0    | 2                   | 3       | 4       | 1            | 1            | 2    |
| <b>Total (%)</b>             | 200              | 200     | 200     | 200          | 200          | 200  | 200                 | 200     | 200     | 200          | 200          | 200  |
| <b>Number of respondents</b> | 1210             | 603     | 557     | 385          | 762          | 3517 | 1206                | 603     | 557     | 383          | 759          | 3508 |

Notes: The respondents were asked the following questions: i) Which of these media are the most important one for you when you inform yourself about what happens in Ghana? Please rank two; and ii) Which of these media are the most important one for you when you inform yourself about what happens in your area? Please rank two. As all respondents could list two main sources, the percent shares add up to 200%. Com. cit. = common citizen; UC mem. = Unit Committee member; DA mem. = District Assembly member; Trad. Leader = Traditional leader

B) Main personal information sources in percent (%) for all respondents combined (column All) and separately for the different categories of the respondents

|                                       | News about Ghana |         |         |              |              |      | News about own area |         |         |              |              |      |
|---------------------------------------|------------------|---------|---------|--------------|--------------|------|---------------------|---------|---------|--------------|--------------|------|
|                                       | Com. cit.        | UC mem. | DA mem. | Trad. leader | Other leader | All  | Com. cit.           | UC mem. | DA mem. | Trad. leader | Other leader | All  |
| No first source                       | 6                | 8       | 4       | 7            | 6            | 6    | 4                   | 1       | 0       | 1            | 4            | 3    |
| No second source                      | 14               | 16      | 9       | 13           | 12           | 13   | 8                   | 4       | 2       | 5            | 7            | 6    |
| A District Assembly member            | 35               | 65      | 62      | 47           | 54           | 50   | 41                  | 69      | 26      | 65           | 54           | 49   |
| A Unit Committee member               | 11               | 24      | 9       | 11           | 22           | 15   | 16                  | 32      | 46      | 15           | 22           | 25   |
| A Chief                               | 11               | 13      | 4       | 16           | 17           | 12   | 14                  | 23      | 16      | 32           | 26           | 20   |
| Another local leader                  | 6                | 5       | 8       | 19           | 12           | 9    | 7                   | 8       | 22      | 28           | 19           | 14   |
| A family member                       | 33               | 10      | 6       | 28           | 15           | 20   | 31                  | 6       | 3       | 13           | 11           | 16   |
| A friend                              | 46               | 32      | 49      | 24           | 35           | 39   | 38                  | 20      | 10      | 12           | 22           | 24   |
| Colleagues at work                    | 14               | 8       | 22      | 7            | 7            | 12   | 9                   | 2       | 2       | 2            | 5            | 5    |
| Other villager or neighbor            | 21               | 5       | 7       | 15           | 8            | 13   | 25                  | 24      | 57      | 18           | 19           | 28   |
| Meetings org. by local leaders        | 1                | 2       | 7       | 4            | 7            | 4    | 4                   | 3       | 10      | 5            | 6            | 5    |
| Meetings org. by a community group    | 1                | 6       | 4       | 4            | 3            | 1    | 2                   | 6       | 4       | 2            | 3            | 2    |
| Meetings org. by another organization | 0                | 4       | 6       | 1            | 1            | 3    | 0                   | 0       | 1       | 0            | 1            | 2    |
| other                                 | 2                | 2       | 3       | 4            | 1            | 2    | 1                   | 1       | 2       | 3            | 1            | 1    |
| <b>Total (%)</b>                      | 200              | 200     | 200     | 200          | 200          | 199  | 200                 | 200     | 200     | 200          | 200          | 199  |
| <b>Number of respondents</b>          | 1209             | 603     | 557     | 385          | 755          | 3509 | 1206                | 603     | 557     | 384          | 757          | 3507 |

Notes: The respondents were asked the following questions: i) Which of these people or meetings are the most important one for you when you inform yourself about what happens in Ghana? Please rank two; and ii) Which of these people or meetings are the most important one for you when you inform yourself about what happens in your area? Please rank two. As all respondents could list two main sources, the percent shares add up to 200%. Com. cit. = common citizen; UC mem. = Unit Committee member; DA mem. = District Assembly member; Trad. Leader = Traditional leader.

**SA Table 2. Main media and personal source for information about oil, gas, and mining revenues**

A) Main media information sources in percent (%) for all respondents combined (column All) and separately for the different categories of the respondents

|                       | National revenue information |         |         |              |              |      | Local revenue information |         |         |              |              |     |
|-----------------------|------------------------------|---------|---------|--------------|--------------|------|---------------------------|---------|---------|--------------|--------------|-----|
|                       | Com. cit.                    | UC mem. | DA mem. | Trad. leader | Other leader | All  | Com. cit.                 | UC mem. | DA mem. | Trad. leader | Other leader | All |
| No first source       | 0                            | 2       | 1       | 1            | 2            | 1    | 8                         | 20      | 31      | 12           | 15           | 15  |
| No second source      | 22                           | 32      | 22      | 31           | 21           | 25   | 23                        | 35      | 55      | 65           | 37           | 38  |
| Radio                 | 91                           | 84      | 82      | 94           | 90           | 88   | 82                        | 70      | 62      | 77           | 79           | 77  |
| Television            | 73                           | 68      | 68      | 62           | 74           | 70   | 71                        | 65      | 34      | 23           | 53           | 53  |
| Internet (websites)   | 7                            | 7       | 13      | 3            | 4            | 7    | 5                         | 0       | 7       | 0            | 2            | 3   |
| Social media          | 0                            | 1       | 1       | 1            | 0            | 1    | 0                         | 0       | 0       | 0            | 0            | 0   |
| Cell phone            | 2                            | 0       | 0       | 1            | 0            | 1    | 8                         | 0       | 0       | 0            | 0            | 2   |
| Newspaper             | 2                            | 3       | 10      | 6            | 4            | 5    | 2                         | 5       | 7       | 0            | 3            | 3   |
| Billboard or poster   | 0                            | 0       | 0       | 0            | 0            | 0    | 0                         | 0       | 0       | 0            | 0            | 0   |
| Information center    | 2                            | 2       | 0       | 1            | 2            | 1    | 0                         | 5       | 0       | 15           | 11           | 6   |
| Information van       | 0                            | 0       | 0       | 0            | 0            | 0    | 2                         | 0       | 3       | 4            | 0            | 1   |
| other                 | 0                            | 0       | 2       | 0            | 1            | 1    | 2                         | 0       | 0       | 4            | 1            | 1   |
| Total (%)             | 200                          | 200     | 200     | 200          | 200          | 200  | 200                       | 200     | 200     | 200          | 200          | 200 |
| Number of respondents | 234                          | 167     | 245     | 170          | 257          | 1073 | 65                        | 20      | 29      | 26           | 95           | 235 |

Notes: The respondents were asked the following questions: i) Which of media are the most important one for you when it comes to getting to know how revenues from oil, gas, and mining are handled in Ghana? Please rank two; and ii) Which of media are the most important one for you when it comes to getting to know how revenues from oil, gas, and mining are handled in your area? Please rank two. As all respondents could list two main sources, the percent shares add up to 200%. Com. cit. = common citizen; UC mem. = Unit Committee member; DA mem. = District Assembly member; Trad. Leader = Traditional leader

B) Main personal information sources in percent (%) for all respondents combined (column All) and separately for the different categories of the respondents

|                                       | National revenue information |         |         |              |              |      | Local revenue information |         |         |              |              |     |
|---------------------------------------|------------------------------|---------|---------|--------------|--------------|------|---------------------------|---------|---------|--------------|--------------|-----|
|                                       | Com. cit.                    | UC mem. | DA mem. | Trad. leader | Other leader | All  | Com. cit.                 | UC mem. | DA mem. | Trad. leader | Other leader | All |
| No first source                       | 59                           | 52      | 57      | 44           | 49           | 53   | 55                        | 10      | 10      | 15           | 35           | 33  |
| No second source                      | 65                           | 68      | 75      | 60           | 64           | 66   | 66                        | 35      | 52      | 31           | 43           | 48  |
| A District Assembly member            | 18                           | 26      | 20      | 14           | 24           | 20   | 23                        | 60      | 76      | 50           | 31           | 39  |
| A Unit Committee member               | 6                            | 10      | 2       | 4            | 11           | 6    | 12                        | 25      | 3       | 12           | 13           | 13  |
| A Chief                               | 6                            | 2       | 1       | 5            | 7            | 4    | 11                        | 5       | 10      | 31           | 22           | 17  |
| Another local leader                  | 4                            | 3       | 3       | 12           | 7            | 6    | 3                         | 30      | 10      | 12           | 16           | 13  |
| A family member                       | 6                            | 5       | 2       | 7            | 2            | 4    | 0                         | 0       | 0       | 4            | 5            | 3   |
| A friend                              | 19                           | 19      | 25      | 22           | 17           | 20   | 12                        | 10      | 14      | 8            | 14           | 13  |
| Colleagues at work                    | 4                            | 10      | 7       | 5            | 3            | 6    | 3                         | 0       | 0       | 4            | 1            | 2   |
| Other villager or neighbor            | 13                           | 2       | 1       | 15           | 6            | 7    | 9                         | 0       | 0       | 4            | 11           | 7   |
| Meetings org. by local leaders        | 0                            | 0       | 1       | 5            | 2            | 2    | 0                         | 0       | 3       | 8            | 3            | 3   |
| Meetings org. by a community group    | 1                            | 2       | 0       | 4            | 1            | 1    | 2                         | 10      | 7       | 12           | 2            | 4   |
| Meetings org. by another organization | 0                            | 3       | 4       | 2            | 3            | 3    | 0                         | 15      | 7       | 8            | 1            | 3   |
| other                                 | 1                            | 0       | 0       | 1            | 2            | 1    | 3                         | 0       | 7       | 4            | 0            | 2   |
| Total (%)                             | 200                          | 200     | 200     | 200          | 200          | 200  | 200                       | 200     | 200     | 200          | 200          | 200 |
| Number of respondents                 | 234                          | 167     | 245     | 169          | 252          | 1067 | 65                        | 20      | 29      | 26           | 91           | 231 |

Notes: As all respondents could list two main sources, the percent shares add up to 200%. The respondents were asked the following questions: i) Which of these people or meetings are the most important one for you when it comes to getting to know how revenues from oil, gas, and mining are handled in Ghana? Please rank two; and ii) Which of these people or meetings are the most important one for you when it comes to getting to know how revenues from oil, gas, and mining are handled in your area? Please rank two. Com. cit. = common citizen; UC mem. = Unit Committee member; DA mem. = District Assembly member; Trad. Leader = Traditional leader

**SA Table 3. Main media and personal information sources for general information and oil, gas, and mining revenues for those over and under 30-years**

A) Main media information sources in percent (%)

|                       | News about Ghana |      | News about own area |      | National revenue information |      | Local revenue information |      |
|-----------------------|------------------|------|---------------------|------|------------------------------|------|---------------------------|------|
|                       | 30+              | < 30 | 30+                 | < 30 | 30+                          | < 30 | 30+                       | < 30 |
| No first source       | 1                | 1    | 8                   | 6    | 1                            | 1    | 15                        | 14   |
| No second source      | 10               | 11   | 35                  | 36   | 25                           | 17   | 41                        | 26   |
| Radio                 | 89               | 76   | 63                  | 56   | 89                           | 83   | 77                        | 74   |
| Television            | 74               | 70   | 16                  | 24   | 69                           | 75   | 50                        | 74   |
| Internet (websites)   | 8                | 26   | 1                   | 6    | 6                            | 17   | 2                         | 9    |
| Social media          | 1                | 6    | 1                   | 3    | 1                            | 2    | 0                         | 0    |
| Cell phone            | 7                | 6    | 23                  | 19   | 1                            | 2    | 2                         | 3    |
| Newspaper             | 5                | 3    | 1                   | 2    | 5                            | 2    | 4                         | 0    |
| Billboard or poster   | 0                | 0    | 5                   | 4    | 0                            | 0    | 1                         | 0    |
| Information center    | 4                | 1    | 40                  | 36   | 2                            | 1    | 8                         | 0    |
| Information van       | 1                | 0    | 6                   | 5    | 0                            | 0    | 2                         | 0    |
| other                 | 0                | 0    | 2                   | 3    | 1                            | 1    | 1                         | 0    |
| Total (%)             | 200              | 200  | 200                 | 200  | 200                          | 200  | 200                       | 200  |
| Number of respondents | 2,959            | 504  | 2,952               | 504  | 937                          | 126  | 200                       | 35   |

Notes: For questions asked, see Table 1 and 2. As all respondents could list two main sources, the percent shares add up to 200%.

B) Main personal information sources in percent (%)

|                                       | News about Ghana |      | News about own area |      | National revenue information |      | Local revenue information |      |
|---------------------------------------|------------------|------|---------------------|------|------------------------------|------|---------------------------|------|
|                                       | 30+              | < 30 | 30+                 | < 30 | 30+                          | < 30 | 30+                       | < 30 |
| No first source                       | 6                | 6    | 3                   | 3    | 51                           | 63   | 30                        | 54   |
| No second source                      | 13               | 15   | 6                   | 8    | 65                           | 74   | 45                        | 69   |
| A District Assembly member            | 52               | 36   | 50                  | 37   | 20                           | 15   | 41                        | 26   |
| A Unit Committee member               | 16               | 11   | 26                  | 19   | 7                            | 6    | 13                        | 9    |
| A Chief                               | 13               | 6    | 22                  | 12   | 5                            | 1    | 20                        | 3    |
| Another local leader                  | 10               | 2    | 16                  | 7    | 6                            | 2    | 13                        | 9    |
| A family member                       | 19               | 27   | 14                  | 26   | 4                            | 3    | 3                         | 0    |
| A friend                              | 36               | 58   | 21                  | 43   | 20                           | 20   | 13                        | 11   |
| Colleagues at work                    | 12               | 13   | 5                   | 9    | 6                            | 4    | 2                         | 0    |
| Other villager or neighbor            | 11               | 20   | 28                  | 28   | 7                            | 10   | 7                         | 11   |
| Meetings org. by local leaders        | 4                | 2    | 6                   | 4    | 2                            | 1    | 3                         | 0    |
| Meetings org. by a community group    | 3                | 2    | 3                   | 3    | 2                            | 2    | 7                         | 6    |
| Meetings org. by another organization | 2                | 1    | 0                   | 0    | 3                            | 0    | 1                         | 3    |
| Other                                 | 2                | 2    | 2                   | 2    | 2                            | 1    | 3                         | 0    |
| Total (%)                             | 200              | 200  | 200                 | 200  | 200                          | 200  | 200                       | 200  |
| Number of respondents                 | 2,953            | 504  | 2,951               | 504  | 931                          | 126  | 196                       | 35   |

Notes: For questions asked, see Table 1 and 2. As all respondents could list two main sources, the percent shares add up to 200%.

**SA Table 4. Main media and personal information sources for general information and oil, gas, and mining revenues for men and women**

A) Main media information sources in percent (%)

|                       | News about Ghana |       | News about own area |       | National revenue information |       | Local revenue information |       |
|-----------------------|------------------|-------|---------------------|-------|------------------------------|-------|---------------------------|-------|
|                       | Men              | Women | Men                 | Women | Men                          | Women | Men                       | Women |
| No first source       | 0                | 3     | 9                   | 5     | 1                            | 0     | 17                        | 5     |
| No second source      | 9                | 17    | 36                  | 34    | 24                           | 27    | 41                        | 25    |
| Radio                 | 88               | 87    | 60                  | 68    | 88                           | 90    | 74                        | 88    |
| Television            | 73               | 72    | 15                  | 27    | 70                           | 70    | 50                        | 68    |
| Internet (websites)   | 12               | 5     | 2                   | 2     | 8                            | 5     | 3                         | 3     |
| Social media          | 2                | 1     | 1                   | 1     | 1                            | 0     | 0                         | 0     |
| Cell phone            | 7                | 6     | 24                  | 14    | 1                            | 2     | 1                         | 8     |
| Newspaper             | 6                | 1     | 1                   | 1     | 6                            | 0     | 4                         | 0     |
| Billboard or poster   | 0                | 0     | 5                   | 4     | 0                            | 0     | 0                         | 3     |
| Information center    | 3                | 6     | 39                  | 38    | 1                            | 4     | 7                         | 3     |
| Information van       | 0                | 2     | 5                   | 6     | 0                            | 1     | 2                         | 0     |
| other                 | 0                | 0     | 3                   | 1     | 1                            | 1     | 1                         | 0     |
| Total (%)             | 200              | 200   | 200                 | 200   | 200                          | 200   | 200                       | 200   |
| Number of respondents | 2,744            | 770   | 2,741               | 766   | 916                          | 157   | 195                       | 40    |

Notes: For questions asked, see Table 1 and 2. As all respondents could list two main sources, the percent shares add up to 200%.

B) Main personal information sources in percent (%)

|                                       | News about Ghana |       | News about own area |       | National revenue information |       | Local revenue information |       |
|---------------------------------------|------------------|-------|---------------------|-------|------------------------------|-------|---------------------------|-------|
|                                       | Men              | Women | Men                 | Women | Men                          | Women | Men                       | Women |
| No first source                       | 6                | 5     | 2                   | 5     | 52                           | 58    | 29                        | 53    |
| No second source                      | 14               | 9     | 6                   | 7     | 67                           | 63    | 46                        | 60    |
| A District Assembly member            | 53               | 37    | 51                  | 38    | 21                           | 15    | 41                        | 28    |
| A Unit Committee member               | 16               | 14    | 26                  | 20    | 7                            | 4     | 13                        | 10    |
| A Chief                               | 12               | 10    | 22                  | 13    | 4                            | 5     | 19                        | 8     |
| Another local leader                  | 9                | 9     | 15                  | 10    | 6                            | 5     | 13                        | 10    |
| A family member                       | 15               | 40    | 10                  | 35    | 4                            | 7     | 3                         | 0     |
| A friend                              | 40               | 38    | 23                  | 30    | 20                           | 22    | 12                        | 15    |
| Colleagues at work                    | 13               | 8     | 5                   | 6     | 6                            | 3     | 2                         | 3     |
| Other villager or neighbor            | 9                | 24    | 28                  | 30    | 6                            | 15    | 6                         | 13    |
| Meetings org. by local leaders        | 4                | 3     | 6                   | 2     | 2                            | 1     | 3                         | 0     |
| Meetings org. by a community group    | 3                | 3     | 4                   | 3     | 2                            | 1     | 7                         | 3     |
| Meetings org. by another organization | 3                | 1     | 0                   | 0     | 3                            | 0     | 2                         | 0     |
| Other                                 | 2                | 1     | 2                   | 0     | 1                            | 0     | 3                         | 0     |
| Total (%)                             | 200              | 200   | 200                 | 200   | 200                          | 200   | 200                       | 200   |
| Number of respondents                 | 2,739            | 769   | 2,741               | 765   | 910                          | 157   | 191                       | 40    |

Notes: For questions asked, see Table 1 and 2. As all respondents could list two main sources, the percent shares add up to 200%.

**SA Table 5. Most and least trusted media and personal information sources**

A) Most and least trusted media in percent (%) for all respondents combined (column All) and separately for the different categories of the respondents.

|                       | Trusted media |         |         |              |              |      |                       | Distrusted media |         |         |              |              |      |
|-----------------------|---------------|---------|---------|--------------|--------------|------|-----------------------|------------------|---------|---------|--------------|--------------|------|
|                       | Com. cit.     | UC mem. | DA mem. | Trad. leader | Other leader | All  |                       | Com. cit.        | UC mem. | DA mem. | Trad. leader | Other leader | All  |
| Distrust all          | 7             | 3       | 1       | 4            | 5            | 4    | Trust all             | 29               | 37      | 24      | 35           | 49           | 34   |
| Trust only one        | 14            | 10      | 5       | 15           | 16           | 12   | Distrust only one     | 35               | 44      | 40      | 52           | 59           | 44   |
| Radio                 | 80            | 86      | 78      | 87           | 85           | 83   | Radio                 | 20               | 16      | 23      | 15           | 15           | 18   |
| Television            | 72            | 75      | 77      | 70           | 71           | 73   | Television            | 6                | 9       | 4       | 4            | 5            | 6    |
| Internet (websites)   | 9             | 9       | 17      | 4            | 5            | 9    | Internet (websites)   | 15               | 18      | 20      | 24           | 8            | 16   |
| Social media          | 1             | 1       | 2       | 1            | 0            | 1    | Social media          | 34               | 29      | 40      | 29           | 21           | 31   |
| Cell phone            | 7             | 5       | 6       | 11           | 2            | 6    | Cell phone            | 30               | 20      | 32      | 14           | 15           | 24   |
| Newspaper             | 3             | 4       | 11      | 4            | 6            | 5    | Newspaper             | 10               | 7       | 8       | 10           | 7            | 8    |
| Billboard or poster   | 0             | 0       | 1       | 0            | 1            | 0    | Billboard or poster   | 8                | 6       | 4       | 8            | 5            | 7    |
| Information center    | 4             | 5       | 2       | 3            | 6            | 4    | Information center    | 6                | 7       | 5       | 7            | 10           | 7    |
| Information van       | 2             | 1       | 1       | 1            | 1            | 1    | Information van       | 4                | 4       | 1       | 2            | 4            | 3    |
| other                 | 0             | 0       | 0       | 0            | 1            | 0    | other                 | 0                | 0       | 0       | 0            | 0            | 0    |
| Total (%)             | 200           | 200     | 200     | 200          | 200          | 200  | Total (%)             | 199              | 199     | 200     | 200          | 198          | 199  |
| Number of respondents | 1195          | 598     | 554     | 383          | 757          | 3487 | Number of respondents | 1136             | 558     | 554     | 376          | 707          | 3331 |

Notes: For questions asked, see Table 1 and 2. As all respondents could list two main sources, the percent shares add up to 200%.

B) Most and least trusted people in percent (%) for all respondents combined (column All) and separately for the different categories of the respondents.

|                                       | Trusted persons |         |         |              |              |      |                                       | Distrusted persons |         |         |              |              |      |
|---------------------------------------|-----------------|---------|---------|--------------|--------------|------|---------------------------------------|--------------------|---------|---------|--------------|--------------|------|
|                                       | Com. cit.       | UC mem. | DA mem. | Trad. leader | Other leader | All  |                                       | Com. cit.          | UC mem. | DA mem. | Trad. leader | Other leader | All  |
| Distrust all                          | 8               | 3       | 2       | 5            | 8            | 6    | Trust all                             | 30                 | 36      | 40      | 34           | 49           | 37   |
| Trust only one                        | 12              | 7       | 6       | 9            | 12           | 10   | Distrust only one                     | 39                 | 47      | 57      | 50           | 58           | 49   |
| A District Assembly member            | 49              | 85      | 38      | 63           | 59           | 57   | A District Assembly member            | 5                  | 8       | 3       | 2            | 7            | 5    |
| A Unit Committee member               | 13              | 28      | 32      | 8            | 19           | 19   | A Unit Committee member               | 5                  | 4       | 5       | 2            | 5            | 5    |
| A Chief                               | 24              | 33      | 22      | 43           | 33           | 29   | A Chief                               | 2                  | 3       | 4       | 0            | 5            | 3    |
| Another local leader                  | 6               | 6       | 15      | 21           | 14           | 11   | Another local leader                  | 4                  | 7       | 3       | 11           | 5            | 5    |
| A family member                       | 36              | 9       | 8       | 21           | 20           | 22   | A family member                       | 4                  | 6       | 2       | 4            | 2            | 4    |
| A friend                              | 26              | 13      | 10      | 12           | 13           | 17   | A friend                              | 32                 | 34      | 28      | 27           | 18           | 28   |
| Colleagues at work                    | 8               | 2       | 8       | 4            | 4            | 6    | Colleagues at work                    | 16                 | 13      | 5       | 9            | 6            | 11   |
| Other villager or neighbor            | 12              | 6       | 24      | 3            | 8            | 11   | Other villager or neighbor            | 49                 | 30      | 41      | 51           | 29           | 41   |
| Meetings org. by local leaders        | 3               | 2       | 8       | 3            | 6            | 4    | Meetings org. by local leaders        | 4                  | 4       | 3       | 2            | 3            | 3    |
| Meetings org. by a community group    | 2               | 4       | 4       | 3            | 3            | 3    | Meetings org. by a community group    | 3                  | 4       | 2       | 3            | 2            | 3    |
| Meetings org. by another organization | 1               | 1       | 3       | 1            | 1            | 1    | Meetings org. by another organization | 3                  | 2       | 2       | 2            | 3            | 2    |
| other                                 | 0               | 1       | 19      | 3            | 1            | 4    | other                                 | 4                  | 1       | 5       | 2            | 8            | 4    |
| Total (%)                             | 200             | 200     | 200     | 200          | 200          | 200  | Total (%)                             | 200                | 200     | 199     | 200          | 199          | 200  |
| Number of respondents                 | 1194            | 594     | 556     | 382          | 748          | 3474 | Number of respondents                 | 1124               | 566     | 552     | 375          | 712          | 3329 |

Notes: For questions asked, see Table 1 and 2. As all respondents could list two main sources, the percent shares add up to 200%.

**SA Table 6. Most and least trusted media and personal information sources by age and gender**

A) Most and least trusted media and people in percent (%) for under 30-years old and those who are older

|                     | Trusted media |      | Distrusted media |      |                                       | Trusted persons |      | Distrusted persons |      |
|---------------------|---------------|------|------------------|------|---------------------------------------|-----------------|------|--------------------|------|
|                     | 30+           | < 30 | 30+              | < 30 |                                       | 30+             | < 30 | 30+                | < 30 |
| Trust none          | 4             | 4    |                  |      | Trust none                            | 6               | 7    |                    |      |
| Trust all           |               |      | 35               | 29   | Trust all                             |                 |      | 37                 | 39   |
| Trust only one      | 12            | 11   |                  |      | Trust only one                        | 10              | 11   |                    |      |
| Distrust only one   |               |      | 46               | 37   | Distrust only one                     |                 |      | 49                 | 52   |
| Radio               | 84            | 74   | 19               | 15   | A District Assembly member            | 59              | 46   | 5                  | 7    |
| Television          | 74            | 72   | 6                | 5    | A Unit Committee member               | 20              | 15   | 4                  | 5    |
| Internet (websites) | 7             | 22   | 16               | 13   | A Chief                               | 31              | 20   | 3                  | 3    |
| Social media        | 1             | 3    | 30               | 43   | Another local leader                  | 12              | 5    | 5                  | 4    |
| Cell phone          | 6             | 6    | 22               | 36   | A family member                       | 20              | 32   | 4                  | 3    |
| Newspaper           | 6             | 5    | 9                | 5    | A friend                              | 14              | 32   | 27                 | 31   |
| Billboard or poster | 0             | 1    | 7                | 7    | Colleagues at work                    | 5               | 9    | 11                 | 9    |
| Information center  | 5             | 2    | 7                | 7    | Other villager or neighbor            | 10              | 16   | 41                 | 38   |
| Information van     | 1             | 1    | 3                | 3    | Meetings org. by local leaders        | 4               | 3    | 3                  | 3    |
| other               | 0             | 0    | 0                | 0    | Meetings org. by a community group    | 3               | 2    | 3                  | 3    |
| Total (%)           | 200           | 200  | 200              | 200  | Meetings org. by another organization | 1               | 0    | 2                  | 2    |
| Respondents         | 2,929         | 502  | 2,799            | 486  | Other                                 | 4               | 2    | 5                  | 2    |
|                     |               |      |                  |      | Total (%)                             | 200             | 200  | 200                | 200  |
|                     |               |      |                  |      | Respondents                           | 2922            | 500  | 2,805              | 475  |

Notes: For questions asked, see Table 5. As all respondents could list two main sources, the percent shares add up to 200%.

B) Most and least trusted media and people in percent (%) for men and women

|                     | Trusted media |       | Distrusted media |       |                                       | Trusted persons |       | Distrusted persons |       |
|---------------------|---------------|-------|------------------|-------|---------------------------------------|-----------------|-------|--------------------|-------|
|                     | Men           | Women | Men              | Women |                                       | Men             | Women | Men                | Women |
| Trust none          | 3             | 11    |                  |       | Trust none                            | 5               | 9     |                    |       |
| Trust all           |               |       | 32               | 42    | Trust all                             |                 |       | 39                 | 33    |
| Trust only one      | 10            | 20    |                  |       | Trust only one                        | 9               | 12    |                    |       |
| Distrust only one   |               |       | 44               | 47    | Distrust only one                     |                 |       | 51                 | 42    |
| Radio               | 84            | 78    | 17               | 25    | A District Assembly member            | 59              | 47    | 5                  | 6     |
| Television          | 75            | 67    | 5                | 10    | A Unit Committee member               | 20              | 17    | 4                  | 6     |
| Internet (websites) | 10            | 4     | 16               | 16    | A Chief                               | 32              | 20    | 3                  | 2     |
| Social media        | 1             | 1     | 34               | 22    | Another local leader                  | 12              | 8     | 5                  | 5     |
| Cell phone          | 6             | 6     | 27               | 12    | A family member                       | 17              | 39    | 4                  | 5     |
| Newspaper           | 6             | 3     | 8                | 10    | A friend                              | 16              | 18    | 27                 | 32    |
| Billboard or poster | 0             | 1     | 7                | 4     | Colleagues at work                    | 6               | 6     | 10                 | 12    |
| Information center  | 4             | 7     | 7                | 7     | Other villager or neighbor            | 10              | 15    | 40                 | 44    |
| Information van     | 1             | 2     | 3                | 5     | Meetings org. by local leaders        | 5               | 3     | 3                  | 4     |
| Other               | 0             | 0     | 0                | 0     | Meetings org. by a community group    | 3               | 3     | 3                  | 4     |
| Total (%)           | 200           | 200   | 200              | 200   | Meetings org. by another organization | 1               | 1     | 2                  | 3     |
| Respondents         | 2,725         | 755   | 2,620            | 710   | Other                                 | 4               | 2     | 5                  | 2     |
|                     |               |       |                  |       | Total (%)                             | 200             | 200   | 200                | 200   |
|                     |               |       |                  |       | Respondents                           | 2718            | 755   | 2,616              | 712   |

Notes: For questions asked, see Table 5. As all respondents could list two main sources, the percent shares add up to 200%.

**SA Table 7. Respondents that had/had not in the past year received or heard any information from any source about how revenues from oil, gas or mining had been handled in Ghana and own area**

A) In Ghana

|                            | Com. cit. | UC mem. | DA mem. | Trad.<br>leader | Other<br>leader | All  |
|----------------------------|-----------|---------|---------|-----------------|-----------------|------|
| Had not heard ( <i>N</i> ) | 972       | 432     | 311     | 213             | 490             | 2418 |
|                            | 81%       | 72%     | 56%     | 56%             | 66%             | 69%  |
| Had heard ( <i>N</i> )     | 234       | 167     | 245     | 170             | 258             | 1074 |
|                            | 19%       | 28%     | 44%     | 44%             | 34%             | 31%  |
| Total                      | 1206      | 599     | 556     | 383             | 748             | 3492 |

B) In own area

|                            | Com. cit. | UC mem. | DA mem. | Trad.<br>leader | Other<br>leader | All  |
|----------------------------|-----------|---------|---------|-----------------|-----------------|------|
| Had not heard ( <i>N</i> ) | 1138      | 580     | 525     | 356             | 653             | 3252 |
|                            | 95%       | 97%     | 95%     | 93%             | 87%             | 93%  |
| Had heard ( <i>N</i> )     | 65        | 20      | 29      | 26              | 95              | 235  |
|                            | 5%        | 3%      | 5%      | 7%              | 13%             | 7%   |
| Total                      | 1203      | 600     | 554     | 382             | 748             | 3487 |



**SA Table 8. Individual characteristics of informed citizens**

SA Tables 8 and 9 show the results when variables are included for each category (Table 1) – individual, household, and geographic – separately. In SA Table 8, Models 1-3 show the results for National resource revenue management (NRRM) and Models 4-6 for local resource revenue management (LRRM). Models 1 and 4 include the variables for personal characteristics and Models 2 and 5 for social and role related aspects. Models 3 and 6 include the variables that were significant or near significant in the previous models. The results show that although gender is strongly related to NRRM when only individual characteristics are included, its impact disappears when the role-related aspects are included in the estimation model. A similar effect can be observed for LRRM.

|                         | (1)                                     | (2)                 | (3)                 | (4)                                  | (5)                 | (6)                 |
|-------------------------|-----------------------------------------|---------------------|---------------------|--------------------------------------|---------------------|---------------------|
|                         | National resource revenue<br>management |                     |                     | Local resource revenue<br>management |                     |                     |
| Age                     | 1.002<br>(0.78)                         |                     |                     | 0.995*<br>(-1.74)                    |                     | 0.994*<br>(-1.95)   |
|                         | 0.438                                   |                     |                     | 0.085                                |                     | 0.053               |
| Gender                  | 0.778***<br>(-3.94)                     |                     | 1.034<br>(0.39)     | 0.855*<br>(-1.94)                    |                     | 0.988<br>(-0.15)    |
|                         | 0.000                                   |                     | 0.699               | 0.054                                |                     | 0.883               |
| Ethnic majority         | 1.009<br>(0.14)                         |                     |                     | 1.085<br>(0.85)                      |                     |                     |
|                         | 0.891                                   |                     |                     | 0.399                                |                     |                     |
| Education               | 1.010<br>(0.57)                         |                     |                     | 0.972<br>(-1.23)                     |                     |                     |
|                         | 0.569                                   |                     |                     | 0.219                                |                     |                     |
| English literacy skills | 1.181***<br>(3.11)                      |                     | 1.197***<br>(4.60)  | 1.164**<br>(2.22)                    |                     | 1.096*<br>(1.82)    |
|                         | 0.002                                   |                     | 0.000               | 0.028                                |                     | 0.072               |
| Travel to Accra         | 1.267***<br>(3.23)                      |                     | 1.287***<br>(3.39)  | 0.988<br>(-0.12)                     |                     |                     |
|                         | 0.002                                   |                     | 0.001               | 0.902                                |                     |                     |
| Occupation mining       |                                         | 1.825**<br>(2.01)   | 1.909**<br>(2.01)   |                                      | 2.824***<br>(2.67)  | 2.633**<br>(2.38)   |
|                         |                                         | 0.047               | 0.047               |                                      | 0.009               | 0.019               |
| Household head          |                                         | 1.121<br>(1.57)     | 1.107<br>(1.09)     |                                      | 0.903<br>(-1.09)    |                     |
|                         |                                         | 0.120               | 0.276               |                                      | 0.276               |                     |
| Common citizen          |                                         | 0.676***<br>(-5.56) | 0.703***<br>(-4.90) |                                      | 0.766***<br>(-2.87) | 0.782***<br>(-2.66) |
|                         |                                         | 0.000               | 0.000               |                                      | 0.005               | 0.009               |
| Interest in politics    |                                         | 1.075***<br>(3.59)  | 1.058***<br>(2.72)  |                                      | 1.017<br>(0.63)     |                     |
|                         |                                         | 0.000               | 0.008               |                                      | 0.533               |                     |
| Observations            | 3,431                                   | 3,469               | 3,462               | 3,427                                | 3,464               | 3,432               |

*Table shows results for probit regressions, coefficients are shown in odds ratio. Robust t-values are in parentheses and p-values are given under t-values. Estimations use two-stage clustering (districts and electoral area).*

\*\*\*  $p < 0.01$ , \*\*  $p < 0.05$ , \*  $p < 0.1$

**SA Table 9. Household and geographical characteristics of informed citizens**

SA Table 9 shows the results for NRRM (Models 1 and 2) and LRRM (Models 3 and 4). Models 1 and 3 include the variables for household characteristics and Models 2 and 4 for geographic aspects.

|                              | (1)<br>National resource<br>revenue<br>management | (2)<br>National resource<br>revenue<br>management | (3)<br>Local resource<br>revenue<br>management | (4)<br>Local resource<br>revenue<br>management |
|------------------------------|---------------------------------------------------|---------------------------------------------------|------------------------------------------------|------------------------------------------------|
| HH size                      | 1.003<br>(0.35)                                   |                                                   | 1.000<br>(0.01)                                |                                                |
|                              | 0.726                                             |                                                   | 0.990                                          |                                                |
| HH living conditions         | 1.100***<br>(3.44)                                |                                                   | 1.055<br>(1.43)                                |                                                |
|                              | 0.001                                             |                                                   | 0.155                                          |                                                |
| HH TV                        | 1.261**<br>(2.61)                                 |                                                   | 1.098<br>(0.71)                                |                                                |
|                              | 0.010                                             |                                                   | 0.478                                          |                                                |
| HH radio                     | 1.614***<br>(3.65)                                |                                                   | 1.481*<br>(1.81)                               |                                                |
|                              | 0.000                                             |                                                   | 0.073                                          |                                                |
| HH involved in mining        | 1.125<br>(1.04)                                   |                                                   | 1.687***<br>(3.85)                             |                                                |
|                              | 0.302                                             |                                                   | 0.000                                          |                                                |
| Distance to regional capital |                                                   | 0.998**<br>(-2.36)                                |                                                | 0.997**<br>(-2.12)                             |
|                              |                                                   | 0.020                                             |                                                | 0.036                                          |
| Urban area                   |                                                   | 1.180***<br>(2.84)                                |                                                | 0.916<br>(-0.96)                               |
|                              |                                                   | 0.005                                             |                                                | 0.341                                          |
| Presence of mining company   |                                                   | 1.405***<br>(4.68)                                |                                                | 1.569***<br>(4.55)                             |
|                              |                                                   | 0.000                                             |                                                | 0.000                                          |
| Observations                 | 3,420                                             | 3,425                                             | 3,415                                          | 3,422                                          |

*Table shows results for probit regressions, coefficients are shown in odds ratio. Robust t-values are in parentheses and p-values are given under t-values. Estimations use two-stage clustering (districts and electoral area).*

*\*\*\*  $p < 0.01$ , \*\*  $p < 0.05$ , \*  $p < 0.1$*

**SA Table 10. Characteristics of informed citizens. National resource revenue management. Robustness analysis**

|                              | (1)                          | (2)                          | (3)                          | (4)                          | (5)                          | (6)                          | (7)                          | (8)                          |
|------------------------------|------------------------------|------------------------------|------------------------------|------------------------------|------------------------------|------------------------------|------------------------------|------------------------------|
| English skills               | 1.141***<br>(3.18)<br>0.002  | 1.131***<br>(2.87)<br>0.005  | 1.140***<br>(3.10)<br>0.002  | 1.141***<br>(3.16)<br>0.002  | 1.154**<br>(2.55)<br>0.012   | 1.140***<br>(3.15)<br>0.002  | 1.136***<br>(2.98)<br>0.003  | 1.139***<br>(3.13)<br>0.002  |
| Travel to Accra              | 1.242***<br>(2.72)<br>0.007  | 1.236***<br>(2.68)<br>0.008  | 1.241***<br>(2.71)<br>0.008  | 1.241***<br>(2.72)<br>0.007  | 1.244***<br>(2.73)<br>0.007  | 1.233***<br>(2.64)<br>0.010  | 1.254***<br>(2.81)<br>0.006  | 1.247***<br>(2.76)<br>0.007  |
| Occupation mining            | 1.558<br>(1.44)<br>0.152     | 1.533<br>(1.41)<br>0.162     | 1.556<br>(1.43)<br>0.154     | 1.558<br>(1.45)<br>0.151     | 1.559<br>(1.44)<br>0.152     | 1.537<br>(1.39)<br>0.166     | 1.553<br>(1.44)<br>0.153     | 1.625<br>(1.54)<br>0.127     |
| Common citizen               | 0.675***<br>(-6.17)<br>0.000 | 0.657***<br>(-5.56)<br>0.000 | 0.678***<br>(-5.51)<br>0.000 | 0.675***<br>(-6.17)<br>0.000 | 0.675***<br>(-6.16)<br>0.000 | 0.704***<br>(-4.85)<br>0.000 | 0.674***<br>(-6.22)<br>0.000 | 0.673***<br>(-6.21)<br>0.000 |
| Interest in politics         | 1.037*<br>(1.68)<br>0.096    | 1.036*<br>(1.67)<br>0.098    | 1.036*<br>(1.67)<br>0.098    | 1.037*<br>(1.71)<br>0.090    | 1.037*<br>(1.69)<br>0.094    | 1.034<br>(1.58)<br>0.118     | 1.036<br>(1.63)<br>0.105     | 1.036*<br>(1.66)<br>0.099    |
| HH living conditions         | 1.059*<br>(1.97)<br>0.052    | 1.063**<br>(2.07)<br>0.041   | 1.059*<br>(1.97)<br>0.051    | 1.060*<br>(1.96)<br>0.052    | 1.060**<br>(2.00)<br>0.047   | 1.061**<br>(2.03)<br>0.044   | 1.058*<br>(1.91)<br>0.058    | 1.057*<br>(1.91)<br>0.059    |
| HH TV                        | 1.041<br>(0.40)<br>0.692     | 1.011<br>(0.11)<br>0.916     | 1.041<br>(0.40)<br>0.691     | 1.038<br>(0.36)<br>0.717     | 1.044<br>(0.42)<br>0.676     | 1.048<br>(0.46)<br>0.647     | 1.038<br>(0.36)<br>0.719     | 1.038<br>(0.37)<br>0.712     |
| HH radio                     | 1.420**<br>(2.43)<br>0.017   | 1.432**<br>(2.47)<br>0.015   | 1.420**<br>(2.43)<br>0.017   | 1.420**<br>(2.43)<br>0.016   | 1.418**<br>(2.42)<br>0.017   | 1.414**<br>(2.40)<br>0.018   | 1.411**<br>(2.37)<br>0.019   | 1.419**<br>(2.42)<br>0.017   |
| Distance to regional capital | 0.999<br>(-1.41)<br>0.163    | 0.998<br>(-1.49)<br>0.139    | 0.999<br>(-1.41)<br>0.162    | 0.999<br>(-1.38)<br>0.170    | 0.999<br>(-1.41)<br>0.161    | 0.999<br>(-1.40)<br>0.165    | 0.999<br>(-1.29)<br>0.200    | 0.999<br>(-1.31)<br>0.192    |
| Urban area                   | 1.093<br>(1.41)<br>0.161     | 1.095<br>(1.43)<br>0.155     | 1.092<br>(1.41)<br>0.162     | 1.093<br>(1.41)<br>0.160     | 1.093<br>(1.41)<br>0.161     | 1.093<br>(1.41)<br>0.161     | 1.096<br>(1.45)<br>0.149     | 1.101<br>(1.53)<br>0.128     |
| Presence of mining company   | 1.334***<br>(3.63)<br>0.000  | 1.306***<br>(3.37)<br>0.001  | 1.333***<br>(3.57)<br>0.001  | 1.327***<br>(3.43)<br>0.001  | 1.333***<br>(3.61)<br>0.000  | 1.328***<br>(3.56)<br>0.001  | 1.320***<br>(3.46)<br>0.001  | 1.346***<br>(3.60)<br>0.000  |
| Age                          |                              | 0.998<br>(-1.04)<br>0.299    |                              |                              |                              |                              |                              |                              |
| Gender                       |                              |                              | 0.992<br>(-0.12)<br>0.901    |                              |                              |                              |                              |                              |
| Ethnic majority              |                              |                              |                              | 1.018<br>(0.25)<br>0.800     |                              |                              |                              |                              |
| Education                    |                              |                              |                              |                              | 0.995<br>(-0.29)<br>0.776    |                              |                              |                              |
| Household head               |                              |                              |                              |                              |                              | 1.080<br>(1.02)<br>0.310     |                              |                              |
| HH size                      |                              |                              |                              |                              |                              |                              | 0.996<br>(-0.45)<br>0.652    |                              |
| HH involved in mining        |                              |                              |                              |                              |                              |                              |                              | 0.930<br>(-0.55)<br>0.582    |
| Observations                 | 3,384                        | 3,343                        | 3,384                        | 3,384                        | 3,380                        | 3,384                        | 3,350                        | 3,374                        |

Table shows results for probit regressions, coefficients are shown in odds ratio. Robust t-values are in parentheses and p-values are given under t-values. Estimations use two-stage clustering (districts and electoral area). \*\*\*  $p < 0.01$ , \*\*  $p < 0.05$ , \*  $p < 0.1$

**SA Table 11. Characteristics of informed citizens. Local resource revenue management. Robustness analysis**

|                              | (1)      | (2)      | (3)      | (4)      | (7)      | (5)      | (6)      | (8)      | (9)      | (10)     |
|------------------------------|----------|----------|----------|----------|----------|----------|----------|----------|----------|----------|
| Age                          | 0.994*   | 0.994*   | 0.994*   | 0.993**  | 0.994*   | 0.995    | 0.994*   | 0.994*   | 0.994*   | 0.994*   |
|                              | (-1.84)  | (-1.84)  | (-1.83)  | (-2.10)  | (-1.84)  | (-1.52)  | (-1.88)  | (-1.86)  | (-1.87)  | (-1.85)  |
|                              | 0.068    | 0.068    | 0.070    | 0.038    | 0.068    | 0.130    | 0.062    | 0.065    | 0.063    | 0.066    |
| English skills               | 1.053    | 1.057    | 1.053    | 1.119    | 1.065    | 1.058    | 1.057    | 1.044    | 1.057    | 1.057    |
|                              | (1.00)   | (1.07)   | (0.99)   | (1.57)   | (1.22)   | (1.07)   | (1.06)   | (0.83)   | (1.06)   | (1.06)   |
|                              | 0.320    | 0.286    | 0.326    | 0.120    | 0.226    | 0.287    | 0.293    | 0.411    | 0.292    | 0.291    |
| Occupation mining            | 1.634    | 1.641    | 1.634    | 1.626    | 1.620    | 1.680    | 1.651    | 1.647    | 1.622    | 1.692    |
|                              | (1.12)   | (1.13)   | (1.12)   | (1.12)   | (1.08)   | (1.17)   | (1.14)   | (1.14)   | (1.12)   | (1.19)   |
|                              | 0.266    | 0.260    | 0.266    | 0.266    | 0.283    | 0.242    | 0.257    | 0.258    | 0.265    | 0.237    |
| Common citizen               | 0.787**  | 0.776*** | 0.787**  | 0.774*** | 0.780*** | 0.759*** | 0.776*** | 0.795**  | 0.786**  | 0.788**  |
|                              | (-2.56)  | (-2.65)  | (-2.54)  | (-2.75)  | (-2.68)  | (-2.82)  | (-2.68)  | (-2.54)  | (-2.59)  | (-2.54)  |
|                              | 0.012    | 0.009    | 0.012    | 0.007    | 0.008    | 0.006    | 0.009    | 0.012    | 0.011    | 0.012    |
| HH living conditions         | 1.033    | 1.033    | 1.033    | 1.036    | 1.042    | 1.032    | 1.034    | 1.034    | 1.034    | 1.035    |
|                              | (0.91)   | (0.91)   | (0.92)   | (0.98)   | (1.16)   | (0.89)   | (0.93)   | (0.94)   | (0.93)   | (0.99)   |
|                              | 0.364    | 0.363    | 0.361    | 0.330    | 0.248    | 0.377    | 0.352    | 0.347    | 0.354    | 0.323    |
| HH radio                     | 1.392    | 1.393    | 1.392    | 1.395    | 1.416    | 1.398    | 1.409    | 1.389    | 1.402    | 1.412    |
|                              | (1.47)   | (1.48)   | (1.47)   | (1.48)   | (1.57)   | (1.50)   | (1.56)   | (1.46)   | (1.53)   | (1.55)   |
|                              | 0.143    | 0.142    | 0.143    | 0.143    | 0.119    | 0.137    | 0.122    | 0.146    | 0.128    | 0.123    |
| HH involved in mining        | 1.431**  | 1.432**  | 1.432**  | 1.431**  | 1.448**  | 1.432**  | 1.428**  | 1.440**  | 1.436**  | 1.427**  |
|                              | (2.24)   | (2.25)   | (2.24)   | (2.23)   | (2.31)   | (2.24)   | (2.21)   | (2.25)   | (2.27)   | (2.23)   |
|                              | 0.027    | 0.026    | 0.027    | 0.027    | 0.023    | 0.027    | 0.029    | 0.026    | 0.025    | 0.028    |
| Distance to regional capital | 0.998    | 0.998    | 0.998    | 0.998*   | 0.998*   | 0.998    | 0.998    | 0.998    | 0.998    | 0.998*   |
|                              | (-1.63)  | (-1.63)  | (-1.60)  | (-1.66)  | (-1.90)  | (-1.63)  | (-1.63)  | (-1.60)  | (-1.63)  | (-1.80)  |
|                              | 0.107    | 0.107    | 0.113    | 0.099    | 0.060    | 0.105    | 0.106    | 0.112    | 0.105    | 0.074    |
| Presence of mining company   | 1.414*** | 1.418*** | 1.413*** | 1.414*** | 1.416*** | 1.421*** | 1.420*** | 1.390*** | 1.417*** | 1.416*** |
|                              | (3.40)   | (3.41)   | (3.22)   | (3.37)   | (3.41)   | (3.45)   | (3.44)   | (3.17)   | (3.41)   | (3.41)   |
|                              | 0.001    | 0.001    | 0.002    | 0.001    | 0.001    | 0.001    | 0.001    | 0.002    | 0.001    | 0.001    |
| Gender                       |          | 1.028    |          |          |          |          |          |          |          |          |
|                              |          | (0.32)   |          |          |          |          |          |          |          |          |
|                              |          | 0.751    |          |          |          |          |          |          |          |          |
| Ethnic majority              |          |          | 1.003    |          |          |          |          |          |          |          |
|                              |          |          | (0.02)   |          |          |          |          |          |          |          |
|                              |          |          | 0.981    |          |          |          |          |          |          |          |
| Education                    |          |          |          | 0.970    |          |          |          |          |          |          |
|                              |          |          |          | (-1.27)  |          |          |          |          |          |          |
|                              |          |          |          | 0.205    |          |          |          |          |          |          |
| Travel to Accra              |          |          |          |          | 0.866    |          |          |          |          |          |
|                              |          |          |          |          | (-1.35)  |          |          |          |          |          |
|                              |          |          |          |          | 0.180    |          |          |          |          |          |
| Household head               |          |          |          |          |          | 0.918    |          |          |          |          |
|                              |          |          |          |          |          | (-0.84)  |          |          |          |          |
|                              |          |          |          |          |          | 0.402    |          |          |          |          |
| Interest in politics         |          |          |          |          |          |          | 0.978    |          |          |          |
|                              |          |          |          |          |          |          | (-0.84)  |          |          |          |
|                              |          |          |          |          |          |          | 0.404    |          |          |          |
| HH size                      |          |          |          |          |          |          |          | 1.004    |          |          |
|                              |          |          |          |          |          |          |          | (0.33)   |          |          |
|                              |          |          |          |          |          |          |          | 0.744    |          |          |
| HH TV                        |          |          |          |          |          |          |          |          | 0.968    |          |
|                              |          |          |          |          |          |          |          |          | (-0.24)  |          |
|                              |          |          |          |          |          |          |          |          | 0.810    |          |
| Urban area                   |          |          |          |          |          |          |          |          |          | 0.879    |
|                              |          |          |          |          |          |          |          |          |          | (-1.34)  |
|                              |          |          |          |          |          |          |          |          |          | 0.183    |
| Observations                 | 3,353    | 3,353    | 3,353    | 3,349    | 3,352    | 3,353    | 3,331    | 3,320    | 3,353    | 3,353    |

Table shows results for probit regressions, coefficients are shown in odds ratio. Robust t-values are in parentheses and p-values are given under t-values. Estimations use two-stage clustering (districts and electoral area). \*\*\*  $p < 0.01$ , \*\*  $p < 0.05$ , \*  $p < 0.1$



**SA Table 12. Geographic distribution of NRRM and LRRM**

See also the map below.

| Region        | NRRM | LRRM |
|---------------|------|------|
| Upper East    | 41%  | 8%   |
| Ashanti       | 40%  | 4%   |
| Brong-Ahafo   | 34%  | 1%   |
| Northern      | 31%  | 2%   |
| Western       | 28%  | 12%  |
| Eastern       | 28%  | 13%  |
| Greater Accra | 28%  | 9%   |
| Upper West    | 26%  | 3%   |
| Volta         | 24%  | 5%   |
| Central       | 22%  | 10%  |
| Mean          | 30%  | 7%   |

**SA Figure 1. Geographic distribution of NRRM and LRRM**

The maps show the geographic distribution for the two dependent variables, NRRM (Map A) and LRRM (Map B), at the region level, using standard deviation from the mean as the classification method. The map shows the regions that existed before 2019 (Ghana has had 16 regions since February 2019).

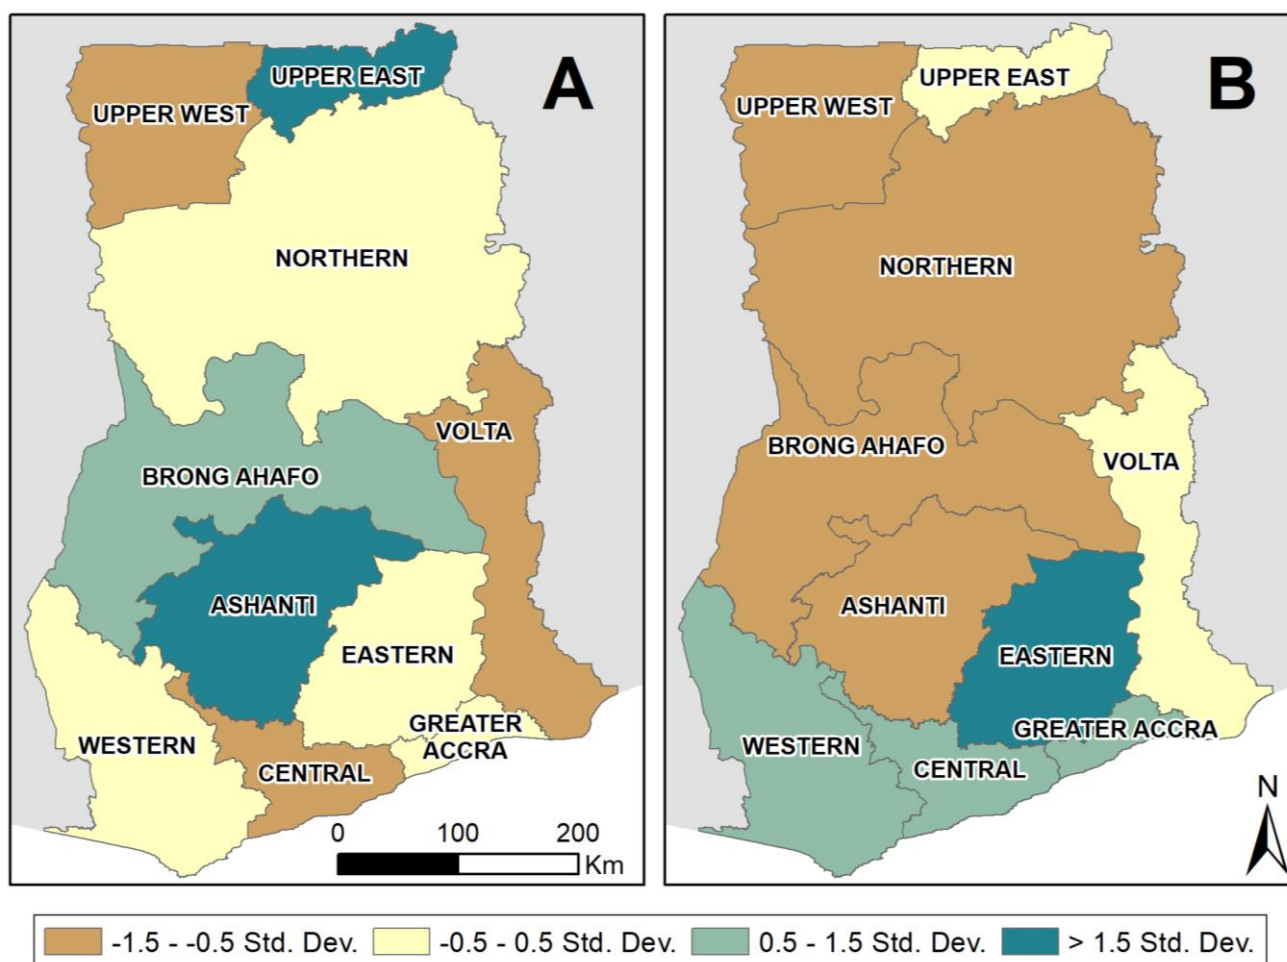

Supplement: Supplementary file 1 [file 22332846]
